# Supplementary material for: Objective Assessment of Cesarean Section Suturing Techniques Using a Uterine Simulator
Source: Research Square preprint supplement (doi:10.21203/rs.3.rs-6266976/v1), 2025-11-28
Supplement: Supplementary file [file 111f40231d939baf354b5ab3.pdf]

## Supplemental 1

**Supplementary table1: Surgeon details**

| No. | Years of clinical experience | OBGYN-S (JSOG) | Subspecialty Certifications in OB/GYN in Japan | Affiliated hospital | Clinical Practice Areas |
|-----|------------------------------|----------------|------------------------------------------------|---------------------|-------------------------|
| 1   | 6                            | No             | No                                             | University hospital | Gen OB/GYN              |
| 2   | 13                           | Yes            | PMFS (JSPNM)                                   | University hospital | Perinatal Care          |
| 3   | 3                            | No             | No                                             | University hospital | Gen OB/GYN              |
| 4   | 3                            | No             | No                                             | University hospital | Gen OB/GYN              |
| 5   | 3                            | No             | No                                             | University hospital | Gen OB/GYN              |
| 6   | 4                            | No             | No                                             | University hospital | Gen OB/GYN              |
| 7   | 4                            | No             | No                                             | University hospital | Gen OB/GYN              |
| 8   | 4                            | No             | No                                             | University hospital | Gen OB/GYN              |
| 9   | 15                           | Yes            | SRM (JSRM), CLS (JSGOE)                        | University hospital | REI                     |
| 10  | 3                            | No             | No                                             | University hospital | Gen OB/GYN              |
| 11  | 3                            | No             | No                                             | University hospital | Gen OB/GYN              |
| 12  | 3                            | No             | No                                             | University hospital | Gen OB/GYN              |
| 13  | 5                            | No             | No                                             | University hospital | Gen OB/GYN              |
| 14  | 5                            | No             | No                                             | University hospital | Gen OB/GYN              |
| 15  | 5                            | No             | No                                             | University          | Gen OB/GYN              |

|    |    |     |                           |                     |                               |
|----|----|-----|---------------------------|---------------------|-------------------------------|
|    |    |     |                           | hospital            |                               |
| 16 | 5  | No  | No                        | University hospital | Gen OB/GYN                    |
| 17 | 3  | No  | No                        | University hospital | Gen OB/GYN                    |
| 18 | 6  | No  | No                        | University hospital | Gen OB/GYN                    |
| 19 | 5  | No  | No                        | University hospital | Gen OB/GYN                    |
| 20 | 3  | No  | No                        | University hospital | Gen OB/GYN                    |
| 21 | 15 | Yes | PMFS (JSPNM)              | University hospital | Perinatal Care                |
| 22 | 12 | Yes | PMFS (JSPNM)              | University hospital | Perinatal Care                |
| 23 | 7  | Yes | No                        | University hospital | Perinatal Care                |
| 24 | 5  | No  | No                        | University hospital | Gen OB/GYN                    |
| 25 | 10 | Yes | No                        | University hospital | Perinatal Care                |
| 26 | 8  | Yes | No                        | University hospital | Perinatal Care, Urogynecology |
| 27 | 13 | Yes | PMFS (JSPNM), SWH (JSMWH) | University hospital | Perinatal Care, Urogynecology |
| 28 | 6  | No  | No                        | University hospital | Gen OB/GYN                    |
| 29 | 13 | Yes | SRM (JSRM)                | University hospital | REI                           |
| 30 | 5  | No  | No                        | University hospital | Gen OB/GYN                    |
| 31 | 7  | Yes | No                        | University hospital | Gyn Onc                       |
| 32 | 19 | Yes | PMFS (JSPNM)              | University hospital | Perinatal Care                |

|    |    |     |                             |                     |                |
|----|----|-----|-----------------------------|---------------------|----------------|
| 33 | 6  | No  | No                          | University hospital | Gen OB/GYN     |
| 34 | 6  | No  | No                          | University hospital | Gen OB/GYN     |
| 35 | 15 | Yes | GOS (JSGO)                  | University hospital | Gyn Onc        |
| 36 | 7  | No  | No                          | University hospital | Gen OB/GYN     |
| 37 | 24 | Yes | No                          | Community hospital  | Gen OB/GYN     |
| 38 | 15 | Yes | PMFS (JSPNM)                | Community hospital  | Gen OB/GYN     |
| 39 | 8  | Yes | No                          | Community hospital  | Gen OB/GYN     |
| 40 | 7  | No  | No                          | University hospital | Gyn Onc        |
| 41 | 7  | Yes | No                          | Community hospital  | Perinatal Care |
| 42 | 32 | Yes | GOS (JSGO),<br>CLS (JSGOE)  | University hospital | Gyn Onc        |
| 43 | 31 | Yes | GOS (JSGO)                  | University hospital | Gyn Onc        |
| 44 | 2  | No  | No                          | University hospital | PGY-2 Resident |
| 45 | 2  | No  | No                          | University hospital | PGY-2 Resident |
| 46 | 2  | No  | No                          | University hospital | PGY-2 Resident |
| 47 | 3  | No  | No                          | University hospital | Gen OB/GYN     |
| 48 | 3  | No  | No                          | University hospital | Gen OB/GYN     |
| 49 | 14 | Yes | GOS (JSGO)                  | University hospital | Gyn Onc        |
| 50 | 31 | Yes | SRM (JSRM),<br>CLS (JSGOE), | University hospital | REI            |

|    |    |     |                           |                     |                |
|----|----|-----|---------------------------|---------------------|----------------|
|    |    |     | SWH (JSMWH)               |                     |                |
| 51 | 27 | Yes | No                        | Community hospital  | Gen OB/GYN     |
| 52 | 3  | No  | No                        | University hospital | Gen OB/GYN     |
| 53 | 8  | No  | No                        | Community hospital  | Gen OB/GYN     |
| 54 | 16 | Yes | SWH (JSMWH)               | Community hospital  | Gen OB/GYN     |
| 55 | 33 | Yes | No                        | Community hospital  | Gen OB/GYN     |
| 56 | 10 | Yes | No                        | University hospital | Perinatal Care |
| 57 | 7  | No  | No                        | University hospital | Gyn Onc        |
| 58 | 1  | No  | No                        | University hospital | PGY-1 Resident |
| 59 | 2  | No  | No                        | University hospital | PGY-2 Resident |
| 60 | 2  | No  | No                        | Community hospital  | PGY-2 Resident |
| 61 | 14 | Yes | GOS (JSGO),<br>SRM (JSRM) | University hospital | Gyn Onc        |
| 62 | 35 | Yes | SWH (JSMWH)               | Community hospital  | Gen OB/GYN     |
| 63 | 8  | Yes | No                        | Community hospital  | Gen OB/GYN     |
| 64 | 2  | No  | No                        | Community hospital  | PGY-2 Resident |
| 65 | 9  | Yes | No                        | University hospital | Gyn Onc        |
| 66 | 2  | No  | No                        | Community hospital  | PGY-2 Resident |
| 67 | 2  | No  | No                        | Community hospital  | PGY-2 Resident |

|    |    |     |                              |                        |            |
|----|----|-----|------------------------------|------------------------|------------|
| 68 | 16 | Yes | PMFS (JSPNM),<br>SWH (JSMWH) | University<br>hospital | REI        |
| 69 | 22 | Yes | GOS (JSGO)                   | University<br>hospital | Gyn Onc    |
| 70 | 12 | Yes | PMFS (JSPNM)                 | Community<br>hospital  | Gen OB/GYN |

The surgeon's years of experience, possession of an obstetrics and gynecology specialist certification, presence of subspecialty certifications in obstetrics and gynecology (including specific certifications held), hospital affiliation, and clinical practice details were recorded.

OBGYN-S (JSOG): Obstetrics and Gynecology Specialist, Japan Society of Obstetrics and Gynecology

PMFS (JSPNM): Perinatal (Maternal-Fetal) Specialist, Japan Society of Perinatal and Neonatal Medicine

GOS (JSGO): Gynecologic Oncology Specialist, Japan Society of Gynecologic Oncology

SRM (JSRM): Specialist in Reproductive Medicine, Japan Society for Reproductive Medicine

SWH (JSMWH): Specialist in Women's Healthcare, Japan Society for Menopause and Women's Health

CLS (JSGOE): Certified Laparoscopic Surgeon, Japan Society of Gynecologic and Obstetric Endoscopy and Minimally Invasive Therapy

Gen OB/GYN: General Obstetrics and Gynecology

Gyn Onc: Gynecologic Oncology

REI: Reproductive Endocrinology and Infertility

PGY: Postgraduate Year

## Supplemental 2

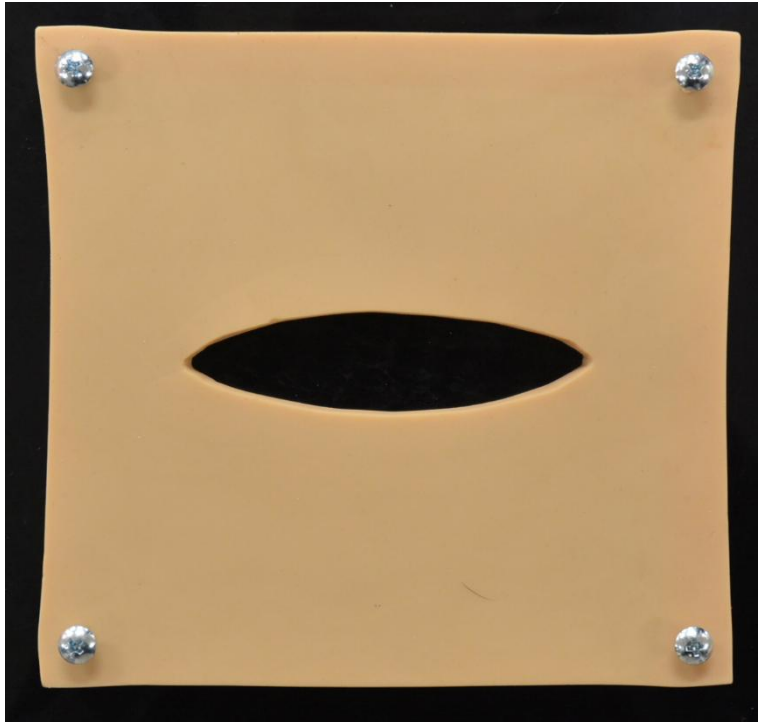

The uterine model measured  $162 \times 151$  and  $160 \times 150$  mm, respectively, when laid flat and when fixed at four points, with a 100-mm incision in the center.

### Supplemental 3

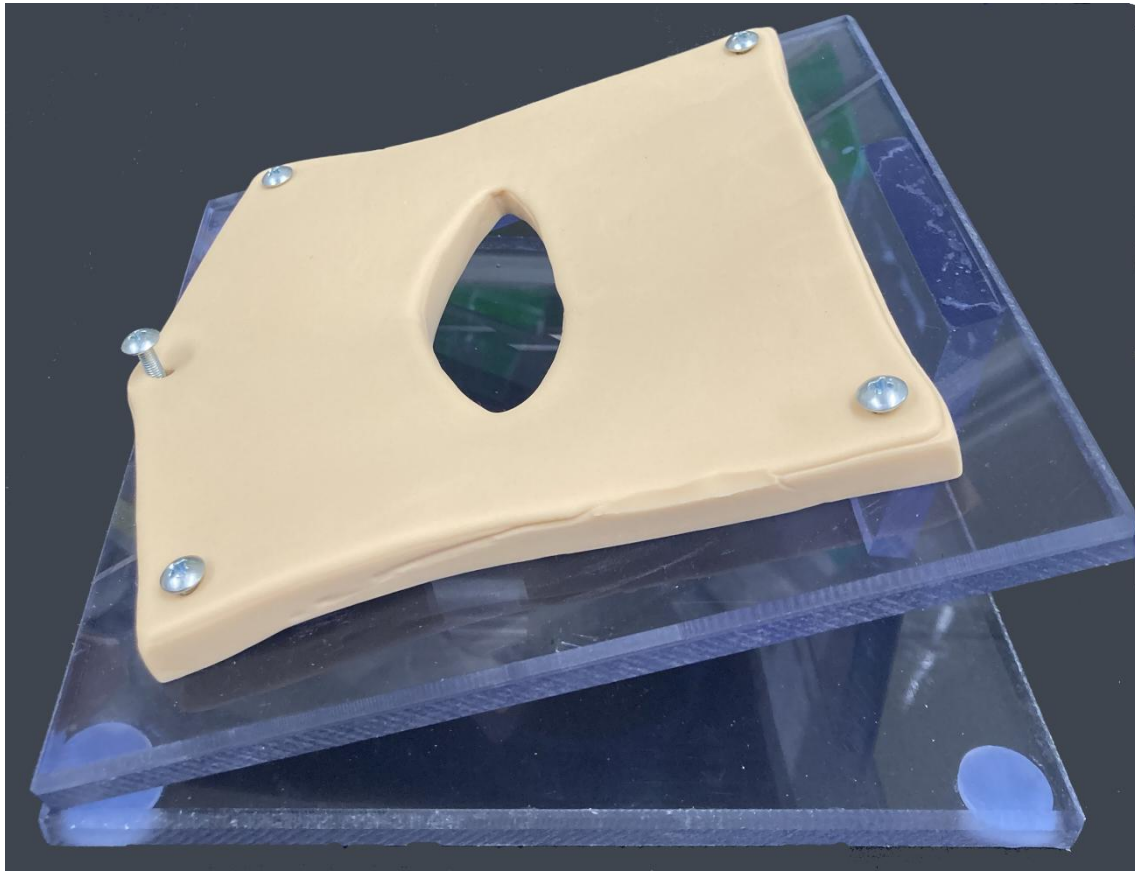

The uterine model was tilted at 20° to mimic a late gravid uterus and fixed at five points, with the upper side oriented toward the patient's head.

#### **Supplemental 4: Video**

Measurement of the highest pressure and decompression time: The sutured uterine model was secured at four points on a pressure device and stabilized using an acrylic plate. Air was introduced to record the peak pressure (hPa) and the time for the pressure to drop to 3 hPa after stopping the air supply (s). The measurements were repeated an average five times.



### Supplemental 5

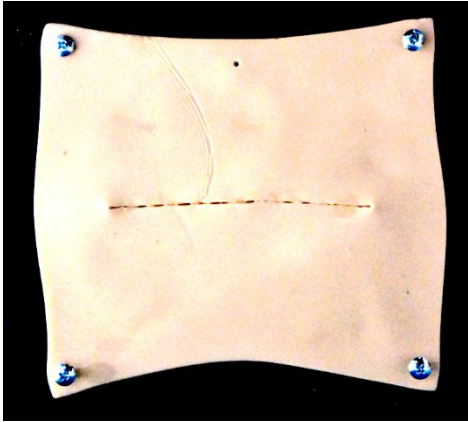

A uterine model with wound edges adhered using glue measuring  $168 \times 135$  cm.
